# Supplementary material
Source: MDPI journal article supplement (https://www.mdpi.com/2073-4433/15/5/568)
Supplement: s1 [file s1]

# Analysis and simulation of PM<sub>2.5</sub> pollution characteristics under the influence of the New Year's Day effect

Qiao Shi <sup>1</sup>, Tangyan Hou <sup>1</sup>, Chengli Wang <sup>2</sup>, Zhe Song <sup>1</sup>, Ningning Yao <sup>3</sup>, Yuhai Sun <sup>3</sup>, Boqiong Jiang <sup>3</sup>, Pengfei Li <sup>4,\*</sup>, Zhibin Wang <sup>1</sup>, and Shaocai Yu <sup>3,\*</sup>

**Table S1** Validation of simulation results of PM<sub>2.5</sub> in 22 cities before and after New Year's Day in 2022. (OBS: observed value, MEAN: average of simulated and observed values, NMB: the normalized mean bias, NME: the normalized mean error, R: Pearson correlation coefficient [1], Case16/Case17: model simulation using MECI emission inventory from 2016/2017).

| City         | MEAN  |        |        | NMB     |         | NME     |        | R      |        |
|--------------|-------|--------|--------|---------|---------|---------|--------|--------|--------|
|              | OBS   | Case16 | Case17 | Case16  | Case17  | Case16  | Case17 | Case16 | Case17 |
| Beijing      | 26.7  | 62.7   | 34.8   | 134.60% | 30.20%  | 143.50% | 20.70% | 0.85   | 0.82   |
| Hangzhou     | 65.9  | 75.5   | 32.1   | 14.50%  | -51.20% | 38.70%  | 45.20% | 0.75   | 0.68   |
| Jinan        | 69.1  | 67.9   | 38.1   | -1.70%  | -44.90% | 37.90%  | 48.70% | 0.55   | 0.51   |
| Nanjing      | 63.1  | 75.9   | 49.1   | 14.90%  | -22.30% | 24.80%  | 26.20% | 0.83   | 0.7    |
| Shijiazhuang | 45.5  | 92.5   | 48.9   | 103.10% | 7.40%   | 117.80% | 18.80% | 0.64   | 0.62   |
| Tianjin      | 36.2  | 75.5   | 39.7   | 108.90% | 9.90%   | 116.60% | 14.50% | 0.82   | 0.86   |
| Zhengzhou    | 102.2 | 117.3  | 55.7   | 14.90%  | -45.50% | 33.20%  | 40.80% | 0.66   | 0.55   |
| Nanyang      | 118.6 | 115    | 53.2   | -2.40%  | -54.80% | 26.40%  | 55.00% | 0.79   | 0.69   |
| Jiaozuo      | 76.4  | 67.8   | 37.5   | -10.70% | -50.60% | 28.50%  | 51.50% | 0.77   | 0.64   |
| Xiangyang    | 117.1 | 113.5  | 65.1   | -2.50%  | -44.00% | 23.50%  | 44.70% | 0.8    | 0.74   |
| Laiocheng    | 94.6  | 100.1  | 50.9   | 6.50%   | -45.90% | 27.90%  | 47.30% | 0.63   | 0.64   |
| Fuzhou       | 33    | 25.1   | 15.1   | -23.90% | -54.10% | 46.60%  | 74.10% | 0.46   | 0.35   |
| Hefei        | 76.5  | 90.1   | 61.8   | 14.30%  | -19.20% | 27.20%  | 24.70% | 0.91   | 0.67   |
| Nanchang     | 86.1  | 99.7   | 42.6   | 14.20%  | -50.50% | 20.70%  | 62.40% | 0.82   | 0.12   |
| Shanghai     | 51    | 37.9   | 19.2   | -25.70% | -62.30% | 37.50%  | 84.50% | 0.7    | 0.73   |
| Taiyuan      | 62.9  | 79.6   | 36.4   | 23.60%  | -42.10% | 29.10%  | 49.20% | 0.85   | 0.54   |
| Wuhan        | 88.1  | 108.2  | 61.9   | 37.50%  | -29.80% | 33.00%  | 26.90% | 0.84   | 0.44   |
| Luoyang      | 78.6  | 89.3   | 46.6   | 14.30%  | -40.40% | 33.20%  | 40.60% | 0.8    | 0.82   |
| Xinyang      | 100.9 | 113.5  | 47.2   | 13.10%  | -53.00% | 31.50%  | 54.00% | 0.72   | 0.7    |
| Luohe        | 130.6 | 127.2  | 58.3   | -2.00%  | -55.10% | 22.30%  | 55.50% | 0.81   | 0.66   |
| Jingzhou     | 114.7 | 116.2  | 60.4   | 1.90%   | -47.00% | 27.70%  | 47.50% | 0.69   | 0.53   |
| Heze         | 114.5 | 122.5  | 51.5   | 7.60%   | -54.80% | 31.60%  | 55.20% | 0.58   | 0.57   |

**Table S2** Validation of meteorological simulation results for 12 cities before and after New Year's Day in 2022. (Among them, T: temperature, R: relative humidity, WS: wind speed, WD: wind direction, P: air pressure, MP: meteorological parameters, OBS: the observed average, MOD: the model simulation average, MB: the average deviation, ME: the average error, RMSE: the root mean square error, R: the Pearson correlation coefficient).

| MP      | City      | OBS    | MOD    | MB     | ME     | RMSE   | R    |
|---------|-----------|--------|--------|--------|--------|--------|------|
| T(°C)   | Jinan     | 2.93   | 0.72   | -2.10  | 2.57   | 2.86   | 0.86 |
|         | Taiyuan   | -3.70  | -3.66  | 0.04   | 1.43   | 1.83   | 0.93 |
|         | Zhengzhou | 3.52   | 2.48   | -1.05  | 1.63   | 2.29   | 0.86 |
|         | Luoyang   | 2.43   | 2.31   | -0.12  | 1.52   | 1.98   | 0.86 |
|         | Nanyang   | 3.88   | 4.63   | 0.75   | 1.63   | 1.93   | 0.89 |
|         | Xinyang   | 5.21   | 5.09   | -0.12  | 1.83   | 2.19   | 0.85 |
|         | Jiaozuo   | 1.57   | 0.65   | -0.92  | 1.47   | 1.93   | 0.89 |
|         | Luohe     | 2.78   | 3.87   | 1.09   | 1.67   | 2.11   | 0.91 |
|         | Xiangyang | 4.91   | 5.76   | 0.85   | 1.51   | 2.02   | 0.88 |
|         | Jingzhou  | 6.48   | 7.91   | 1.43   | 1.78   | 2.14   | 0.91 |
|         | Liaocheng | 1.04   | 1.15   | 0.11   | 1.06   | 1.34   | 0.93 |
|         | Heze      | 2.14   | 2.29   | 0.16   | 1.49   | 1.73   | 0.89 |
| RH(%)   | Jinan     | 41.84  | 45.63  | 3.79   | 5.74   | 9.05   | 0.87 |
|         | Taiyuan   | 46.22  | 44.97  | -1.25  | 9.48   | 11.92  | 0.79 |
|         | Zhengzhou | 50.84  | 48.51  | -2.33  | 5.83   | 7.96   | 0.96 |
|         | Luoyang   | 50.36  | 45.80  | -4.55  | 6.03   | 7.96   | 0.97 |
|         | Nanyang   | 57.68  | 47.83  | -9.84  | 11.39  | 13.99  | 0.93 |
|         | Xinyang   | 61.32  | 46.75  | -14.57 | 15.78  | 19.09  | 0.90 |
|         | Jiaozuo   | 52.05  | 44.43  | -7.61  | 9.85   | 12.54  | 0.88 |
|         | Luohe     | 66.02  | 51.08  | -14.94 | 15.59  | 20.54  | 0.87 |
|         | Xiangyang | 62.90  | 48.08  | -14.83 | 17.52  | 22.20  | 0.79 |
|         | Jingzhou  | 75.21  | 50.69  | -24.52 | 24.57  | 32.26  | 0.72 |
|         | Liaocheng | 60.49  | 54.85  | -5.64  | 8.49   | 11.79  | 0.87 |
|         | Heze      | 64.61  | 57.77  | -6.83  | 8.96   | 11.59  | 0.93 |
| WS(m/s) | Jinan     | 1.85   | 2.19   | 0.34   | 0.72   | 1.14   | 0.59 |
|         | Taiyuan   | 1.27   | 1.41   | 0.14   | 0.41   | 0.67   | 0.83 |
|         | Zhengzhou | 0.54   | 1.10   | 0.56   | 0.77   | 1.08   | 0.83 |
|         | Luoyang   | 2.96   | 2.96   | 0.00   | 0.46   | 0.67   | 0.86 |
|         | Nanyang   | 2.61   | 2.83   | 0.22   | 0.56   | 0.75   | 0.84 |
|         | Xinyang   | 5.53   | 2.90   | -2.63  | 2.80   | 3.39   | 0.65 |
|         | Jiaozuo   | 2.04   | 2.27   | 0.23   | 0.40   | 0.67   | 0.79 |
|         | Luohe     | 1.86   | 1.96   | 0.10   | 0.43   | 0.62   | 0.81 |
|         | Xiangyang | 1.09   | 1.37   | 0.28   | 0.43   | 0.67   | 0.78 |
|         | Jingzhou  | 1.41   | 1.58   | 0.17   | 0.33   | 0.45   | 0.93 |
|         | Liaocheng | 1.63   | 1.67   | 0.04   | 0.32   | 0.40   | 0.93 |
|         | Heze      | 1.75   | 2.13   | 0.38   | 0.53   | 0.71   | 0.84 |
| WD(° )  | Jinan     | 177.94 | 147.07 | -24.52 | 61.52  | 96.32  | 0.50 |
|         | Taiyuan   | 148.82 | 199.46 | 50.63  | 94.49  | 113.98 | 0.40 |
|         | Zhengzhou | 163.72 | 182.99 | 19.27  | 55.65  | 94.03  | 0.71 |
|         | Luoyang   | 153.67 | 184.13 | 30.46  | 47.88  | 69.60  | 0.84 |
|         | Nanyang   | 126.14 | 91.72  | -34.43 | 77.35  | 129.69 | 0.29 |
|         | Xinyang   | 210.09 | 230.93 | 20.84  | 63.92  | 101.08 | 0.69 |
|         | Jiaozuo   | 218.06 | 210.08 | -7.97  | 68.85  | 121.06 | 0.46 |
|         | Luohe     | 239.63 | 207.97 | -31.65 | 85.39  | 137.79 | 0.42 |
|         | Xiangyang | 132.96 | 140.81 | 7.85   | 136.00 | 189.28 | 0.31 |

|        |           |        |        |       |       |        |      |
|--------|-----------|--------|--------|-------|-------|--------|------|
|        | Jingzhou  | 78.21  | 105.33 | 27.12 | 74.08 | 125.82 | 0.36 |
|        | Liaocheng | 140.19 | 138.60 | -1.59 | 77.93 | 130.42 | 0.34 |
|        | Heze      | 104.96 | 107.97 | 3.00  | 45.27 | 88.60  | 0.48 |
| P(hPa) | Jinan     | 1029.6 | 1029.8 | 0.12  | 0.11  | 0.12   | 0.94 |
|        | Taiyuan   | 1031.4 | 1032.7 | 0.13  | 0.13  | 0.16   | 0.96 |
|        | Zhengzhou | 1029.3 | 1028.3 | -0.10 | 0.11  | 0.15   | 0.90 |
|        | Luoyang   | 1029.4 | 1029.2 | -0.02 | 0.08  | 0.11   | 0.92 |
|        | Nanyang   | 1028.8 | 1029.0 | 0.01  | 0.06  | 0.08   | 0.96 |
|        | Xinyang   | 1028.2 | 1028.4 | 0.02  | 0.08  | 0.10   | 0.95 |
|        | Jiaozuo   | 1029.5 | 1028.4 | -0.11 | 0.12  | 0.16   | 0.91 |
|        | Luohe     | 1028.7 | 1027.6 | -0.11 | 0.12  | 0.16   | 0.93 |
|        | Xiangyang | 1028.5 | 1027.4 | -0.11 | 0.11  | 0.14   | 0.97 |
|        | Jingzhou  | 1027.4 | 1026.4 | -0.10 | 0.10  | 0.13   | 0.97 |
|        | Liaocheng | 1029.4 | 1028.6 | -0.08 | 0.09  | 0.12   | 0.94 |
|        | Heze      | 1029.4 | 1028.1 | -0.13 | 0.13  | 0.16   | 0.94 |

**Table S3** Changes in meteorological parameters such as temperature (T), relative humidity (R), wind speed (WS), wind direction (WD), and air pressure (P) during and around New Year's Day. MP: Meteorological parameters, BNY: Before the New Year's Day holiday. DNY: During the New Year's Day holiday. ANY: After the New Year's Day holiday.

| MP      | City      | BNY    | DNY    | ANY    | City     | BNY    | DNY    | ANY    |
|---------|-----------|--------|--------|--------|----------|--------|--------|--------|
| T(°C)   | Jinan     | 3.01   | 3.43   | 2.30   | Taiyaun  | -3.83  | -4.36  | -2.57  |
|         | Zhengzhou | 4.59   | 4.07   | 1.63   | Luoyang  | 3.43   | 3.37   | 0.02   |
|         | Nanyang   | 4.28   | 4.10   | 3.16   | Xinyang  | 5.31   | 6.43   | 3.29   |
|         | Jiaozuo   | 3.16   | 1.54   | 0.02   | Luohe    | 2.45   | 3.41   | 2.18   |
|         | Xiangyang | 4.06   | 5.70   | 4.59   | Jingzhou | 5.78   | 6.90   | 6.54   |
|         | Liaocheng | 0.56   | 1.72   | 0.50   | Heze     | 1.83   | 3.08   | 1.02   |
| RH(%)   | Jinan     | 31.31  | 42.02  | 56.50  | Taiyaun  | 40.69  | 47.81  | 49.38  |
|         | Zhengzhou | 31.00  | 42.55  | 83.13  | Luoyang  | 28.62  | 42.21  | 84.31  |
|         | Nanyang   | 43.31  | 51.50  | 81.31  | Xinyang  | 46.69  | 53.13  | 88.25  |
|         | Jiaozuo   | 37.93  | 49.16  | 70.49  | Luohe    | 48.86  | 60.11  | 92.05  |
|         | Xiangyang | 53.96  | 56.16  | 81.97  | Jingzhou | 68.82  | 71.71  | 86.86  |
|         | Liaocheng | 53.87  | 52.39  | 79.26  | Heze     | 52.19  | 56.00  | 89.94  |
| WS(m/s) | Jinan     | 2.18   | 2.49   | 1.16   | Taiyaun  | 1.41   | 1.31   | 1.07   |
|         | Zhengzhou | 0.51   | 0.71   | 0.33   | Luoyang  | 2.50   | 3.39   | 2.77   |
|         | Nanyang   | 1.90   | 2.58   | 3.37   | Xinyang  | 3.69   | 4.60   | 8.78   |
|         | Jiaozuo   | 2.32   | 2.04   | 1.74   | Luohe    | 1.46   | 1.79   | 2.38   |
|         | Xiangyang | 0.82   | 0.83   | 1.75   | Jingzhou | 0.77   | 1.10   | 2.51   |
|         | Liaocheng | 1.53   | 2.00   | 1.17   | Heze     | 1.42   | 2.03   | 1.68   |
| WD(°)   | Jinan     | 180.12 | 166.82 | 185.56 | Taiyaun  | 167.13 | 153.67 | 123.25 |
|         | Zhengzhou | 204.23 | 168.34 | 116.38 | Luoyang  | 238.10 | 168.14 | 47.52  |
|         | Nanyang   | 181.04 | 137.06 | 55.06  | Xinyang  | 180.44 | 179.50 | 285.63 |
|         | Jiaozuo   | 236.75 | 216.68 | 201.64 | Luohe    | 168.14 | 228.42 | 327.91 |
|         | Xiangyang | 135.28 | 136.54 | 125.39 | Jingzhou | 80.49  | 114.81 | 21.02  |
|         | Liaocheng | 160.75 | 108.31 | 167.49 | Heze     | 150.81 | 104.46 | 59.88  |
| P(hPa)  | Jinan     | 1031.8 | 1028.2 | 1029.7 | Taiyaun  | 1034.6 | 1030.6 | 1029.3 |
|         | Zhengzhou | 1031.7 | 1027.5 | 1029.5 | Luoyang  | 1032.3 | 1027.6 | 1029.1 |
|         | Nanyang   | 1032.2 | 1027.3 | 1027.8 | Xinyang  | 1031.9 | 1026.8 | 1026.6 |
|         | Jiaozuo   | 1031.0 | 1028.0 | 1030.0 | Luohe    | 1032.1 | 1027.1 | 1027.6 |
|         | Xiangyang | 1032.3 | 1027.1 | 1026.6 | Jingzhou | 1031.3 | 1026.5 | 1024.9 |
|         | Liaocheng | 1031.5 | 1027.8 | 1029.5 | Heze     | 1032.1 | 1027.7 | 1029.2 |

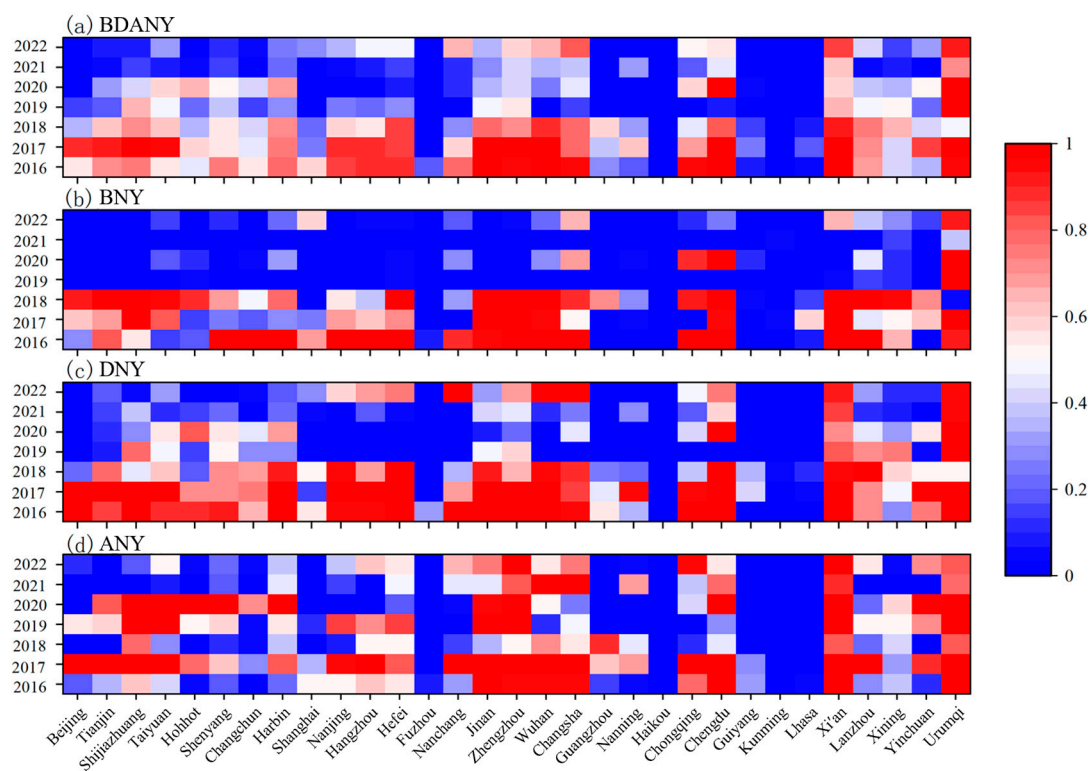

**Figure S1** The exceeding rate of  $PM_{2.5}$  concentration in 31 administrative cities across the country during and before New Year's Day.

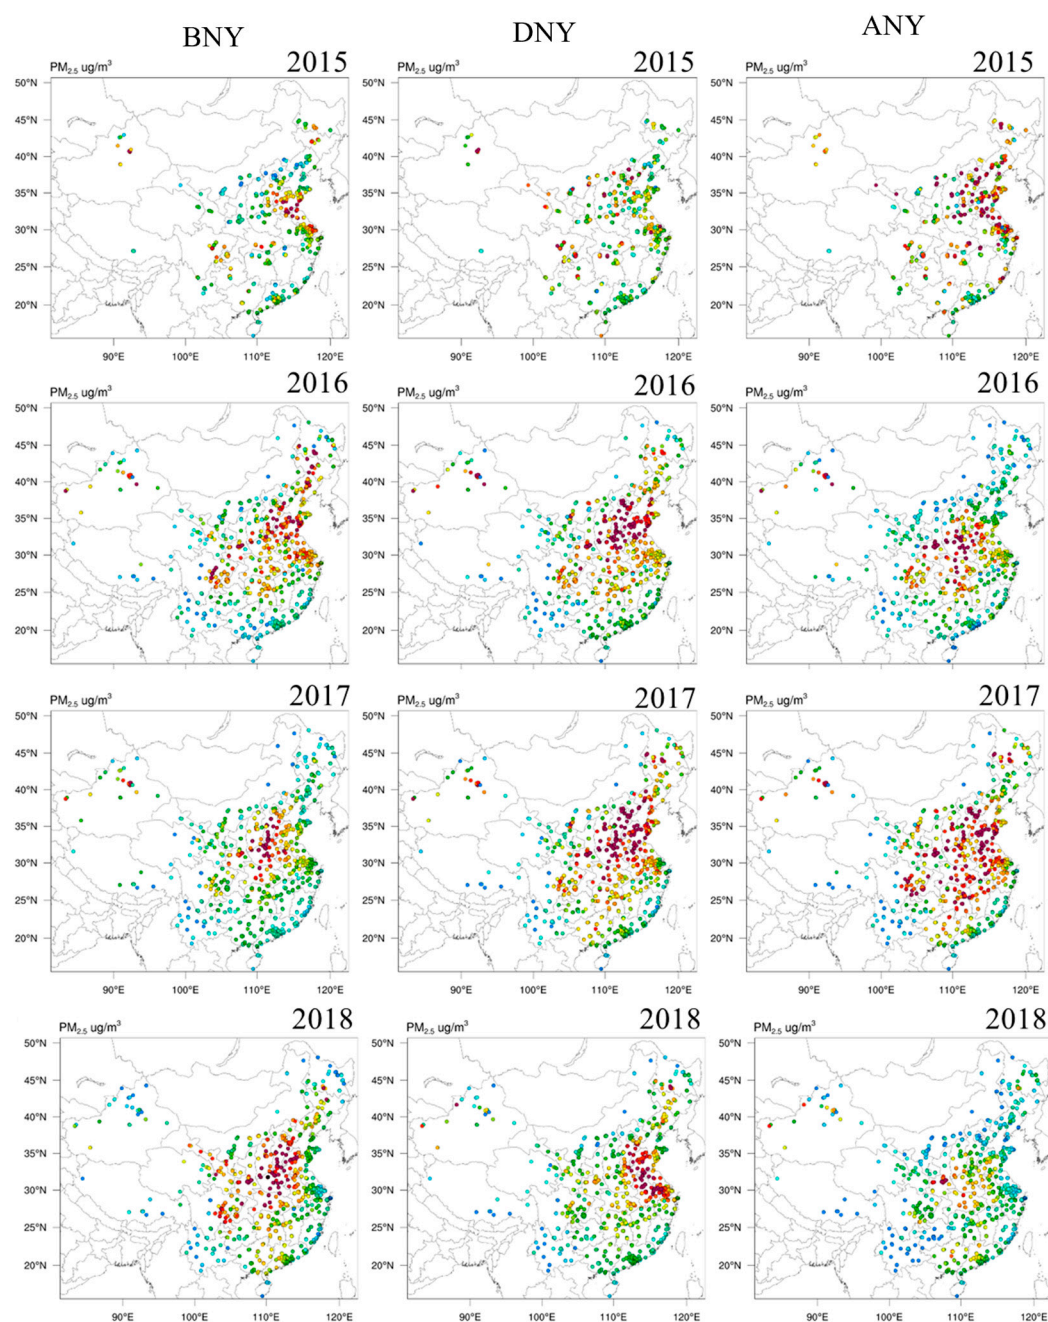

**Figure S2** The spatial distribution of  $PM_{2.5}$  pollutant mass concentration during the New Year's Day period from 2015 to 2018 nationwide. BNY: Before the New Year's Day holiday. DNY: During the New Year's Day holiday. ANY: After the New Year's Day holiday.

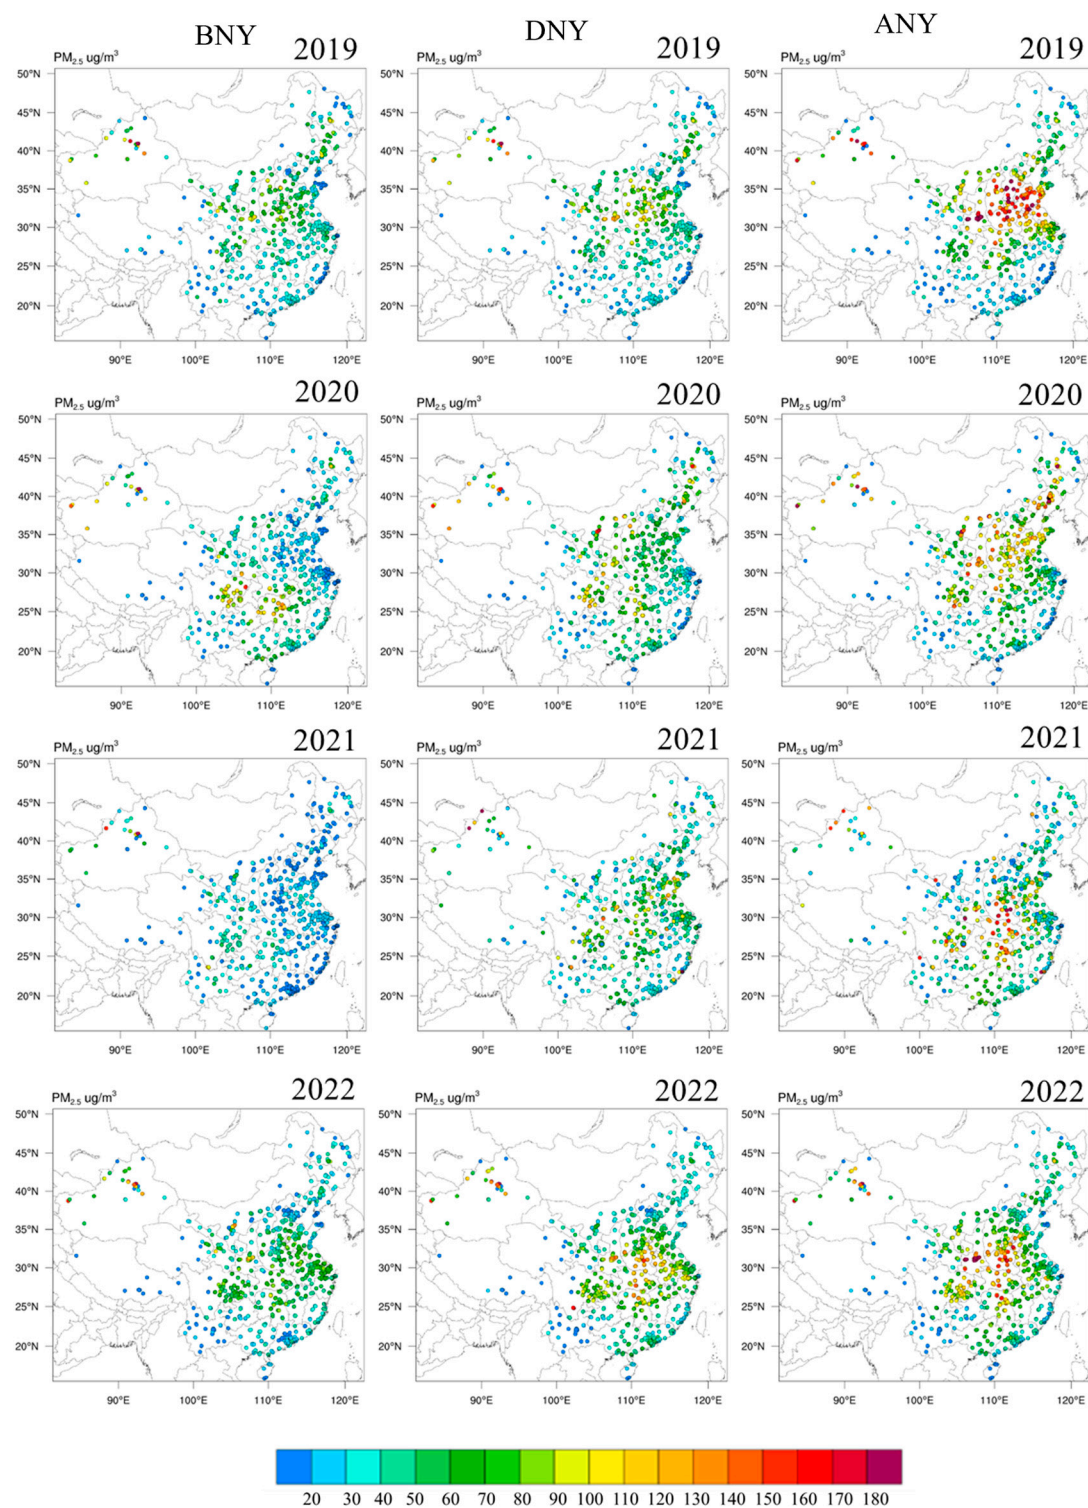

**Figure S3** The spatial distribution of  $PM_{2.5}$  pollutant mass concentration during the New Year's Day period from 2019 to 2022 nationwide. BNY: Before the New Year's Day holiday. DNY: During the New Year's Day holiday. ANY: After the New Year's Day holiday.



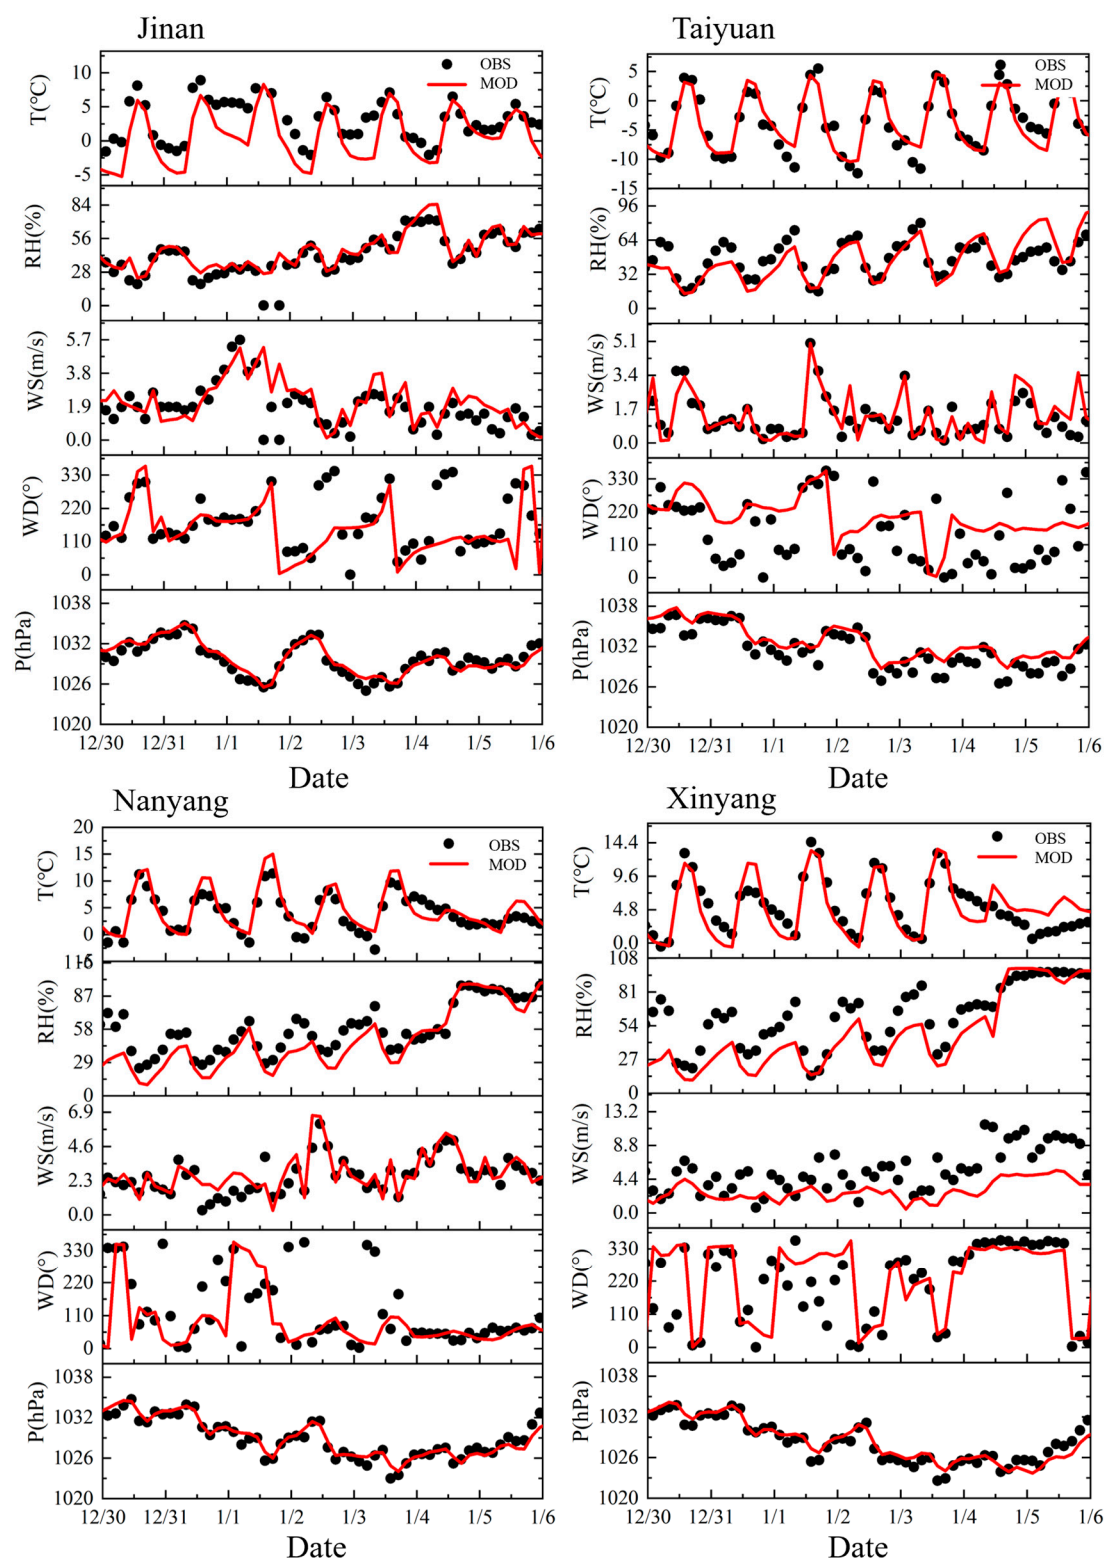

**Figure S4** The time series comparison of simulated and observed meteorological parameters for Jinan, Taiyuan, Nanyang and Xinyang.



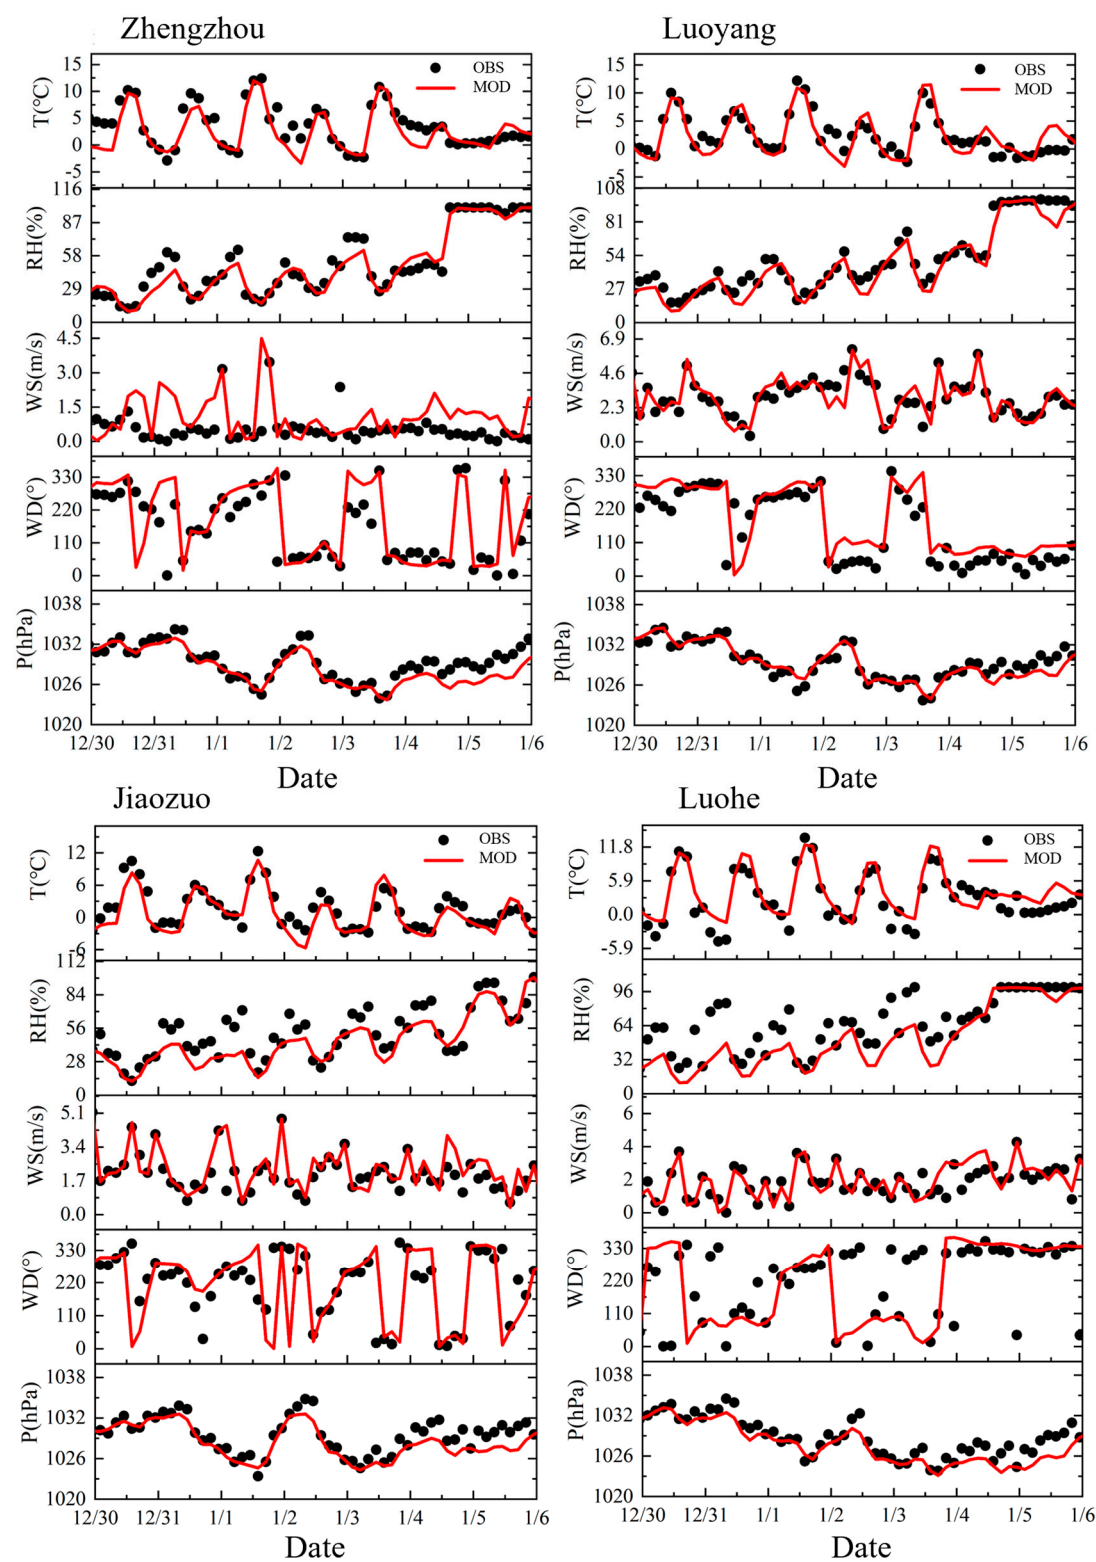

**Figure S5** The time series comparison of simulated and observed meteorological parameters for Zhengzhou, Luoyang, Jiaozuo and Luohe.

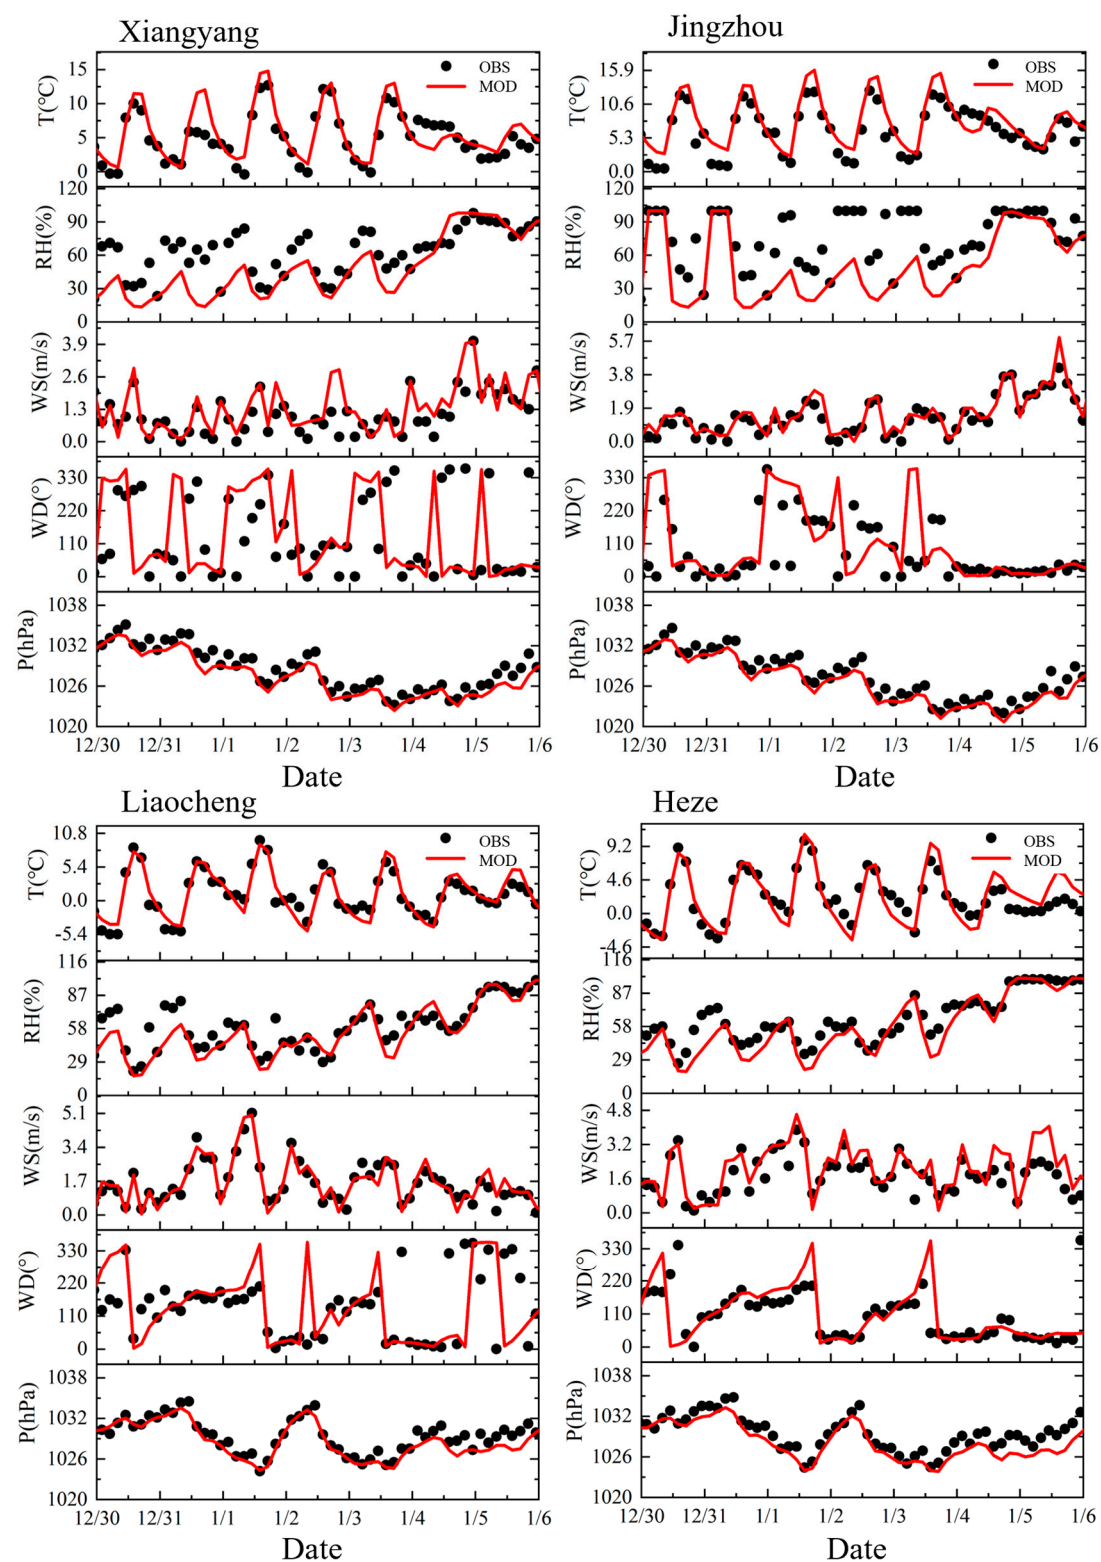

**Figure S6** The time series comparison of simulated and observed meteorological parameters for Xiangyang, Jingzhou, Liaocheng and Heze.

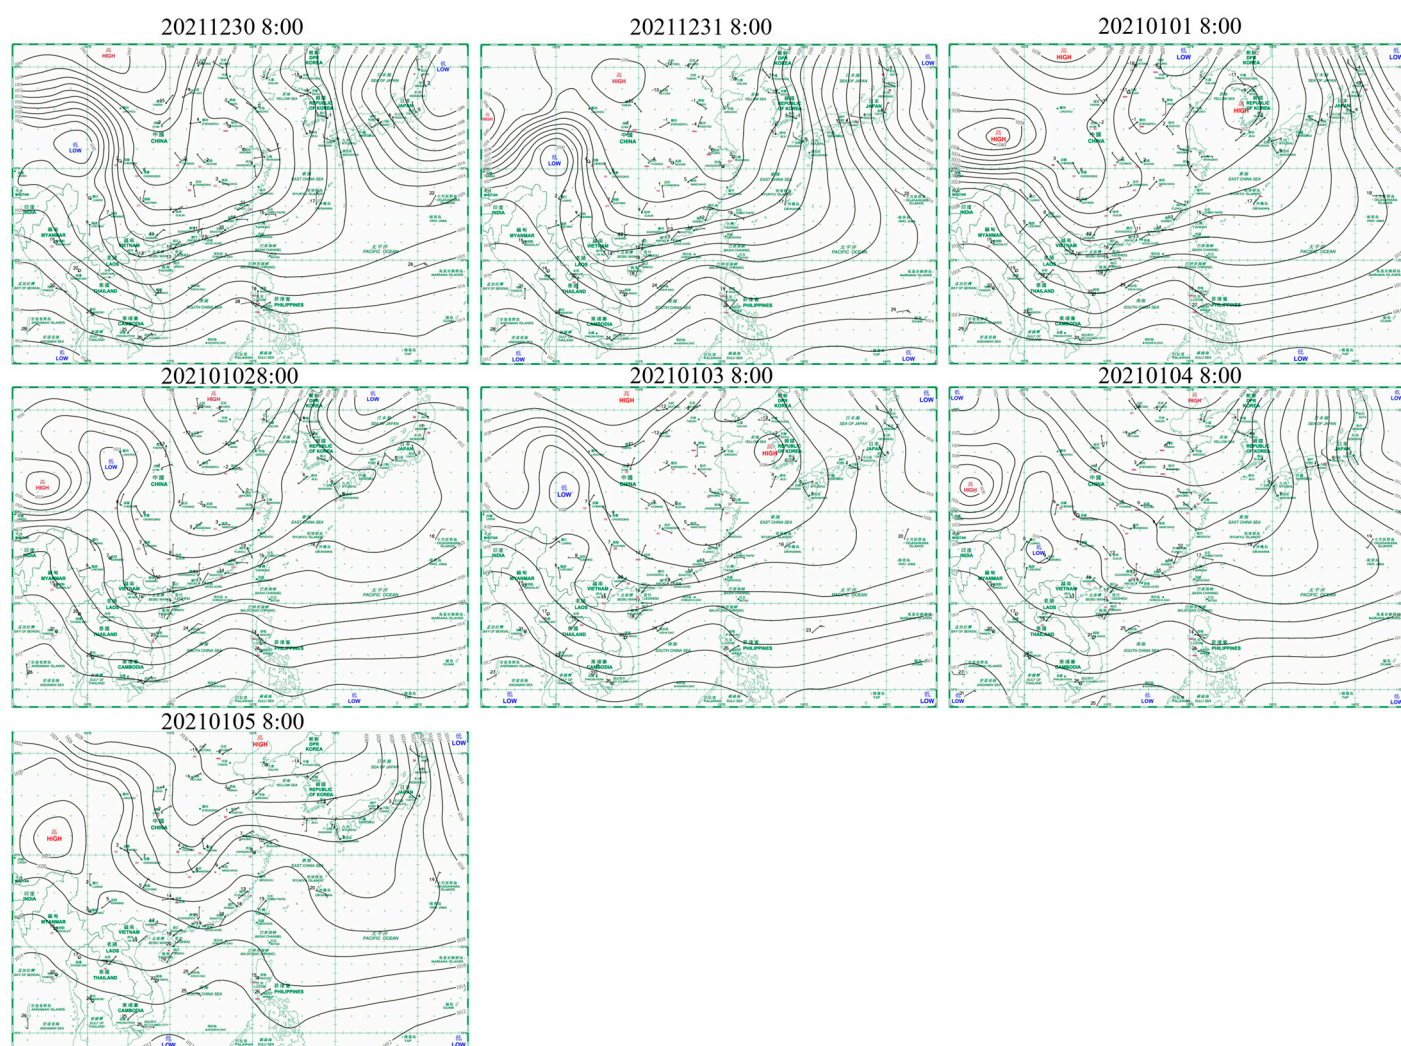

**Figure S7** Evolution of near surface sea level isobars from December 30, 2021 to January 5, 2022.

## References

- 
1. Yu, S.; Eder, B.; Dennis, R.; Chu, S.H.; Schwartz, S.E. New unbiased symmetric metrics for evaluation of air quality models. *Atmospheric Science Letters* **2006**, *7*, 26–34, doi:10.1002/asl.125.
